# Supplementary material for: Role of EZH2 in the Growth of Prostate Cancer Stem Cells Isolated from LNCaP Cells
Source: PubMed Central journal article supplement (PMC3709767; doi:10.3390/ijms140611981), 2013-06-05
Supplement: ijms-14-11981-s001.pdf [file ijms-14-11981-s001.pdf]

## Supplementary Information

**Table S1.** List of primers for PCR.

| <b>Target gene</b> | <b>Forward primer (5'→3')</b> | <b>Reverse primer (5'→3')</b> |
|--------------------|-------------------------------|-------------------------------|
| EZH2               | CCAAGAGAGCCATCCAGACT          | CGATGCCGACATACTTCAGG          |
| CCNE2              | AGGTTTGGAGTGGGACAGTA          | ATTGCACACTGGTGACAACCT         |
| CCND3              | ATACCTTTGCCATGTACCCG          | TGGCTGTGACATCTGTAGGA          |
| CDK4               | ATGTTGTCCGGCTGATGGA           | GTGAACGATGCAATTGGCA           |
| CDK6               | GTCATTCAAGGACCACCAA           | GGCAGGTAAGAATGGCTATC          |
| AR                 | CCTGAGATTGAGGTGCTCTT          | TCCTAGGCAACAGAAGTGTC          |
| Raf1               | CCAGTCGGATGTCTACTCCT          | AGCAGCTCAATGGAAGACAG          |
| P21C1P1            | CTTCAGTACCCTCTCAGCTC          | CTGAGGTAGAACTAGGGTGC          |
| Wnt-10b            | GAATCCACAACAACAGGGTG          | AAGTAGACCAGCTCTCCTGA          |
| β-catenin          | GCATCAAGGGAGACACCA            | TGACCTAACTAAAGCACCAGA         |
| P14ARf             | CAGAGGCAGTAACCATGCC           | TCAGAGCCTCTCTGGTTCTT          |
| c-myc              | ACACATCAGCACAACACTACGC        | CCTCTTGACATTCTCCTCGGT         |
| wnt1               | TGCCTCTCTTCTTCCCCTTT          | CCCTGTAACCTCCTGCTTCA          |
| wnt6               | AGCGTGCAGCTCGAAGAGAA          | TTCCAGAGCCCTGGGAGTT           |
| wnt10a             | AACCCCACTCACTTCT              | GGTGAAAGGATGGAGACAGA          |
| SOX2               | CACCTACAGCATGTCCTACTC         | CATGCTGTTTCTTACTCTCCTC        |
| Nanog              | TGCCTCACACGGAGACTGTC          | TGCTATTCTTCGGCCAGTTG          |
| CXCR4              | ACTACACCGAGGAAATGGGCT         | CCCACAATGCCAGTTAAGAAGA        |
| OCT4               | GACAACAATGAAAATCTTCAGGAGA     | CTGGCGCCGGTTACAGAACCA         |

© 2013 by the authors; licensee MDPI, Basel, Switzerland. This article is an open access article distributed under the terms and conditions of the Creative Commons Attribution license (<http://creativecommons.org/licenses/by/3.0/>).
